# Supplementary material
Source: PubMed Central journal article supplement (PMC10200309)
Supplement: awac250_supplementary_data.pdf [file awac250_supplementary_data.pdf]

**Supplementary Table 1. Risk of progression to CDR > 0 from multivariate Cox proportional hazards model with death as a competing risk.**

|                                                     | <b>Hazard ratio<sup>a</sup></b> | <b>95% CI</b> | <b>P-value</b>                                        |
|-----------------------------------------------------|---------------------------------|---------------|-------------------------------------------------------|
| Preclinical biomarker (pos vs neg)                  | 2.794                           | 1.842-4.240   | <b>&lt;.0001</b>                                      |
| Centered Age (with APOE ε4+)                        | 1.052                           | 1.008-1.097   | <b>&lt;.0001</b>                                      |
| Centered Age (with APOE ε4-)                        | 1.133                           | 1.101-1.165   | <b>&lt;.0001</b>                                      |
| APOE carrier (ε4+ vs ε4-) <sup>b</sup>              | 1.941                           | 1.185-3.179   | <b>p=0.0266</b><br>APOE alone                         |
|                                                     |                                 |               | <b>p=0.0045</b><br>APOE x centered<br>age interaction |
| Sex (female vs male)                                | 0.976                           | 0.629-1.513   | 0.9129                                                |
| Self-reported race (NHW vs AA)                      | 0.877                           | 0.434-1.773   | 0.7152                                                |
| Education <sup>c</sup>                              | 0.997                           | 0.907-1.095   | 0.9425                                                |
| PRS                                                 | 1.032                           | 1.004-1.060   | <b>0.0231</b>                                         |
| Interval from baseline to final clinical assessment | 0.972                           | 0.912-1.037   | 0.3922                                                |

Abbreviations: AA = African-American; neg = negative; NHW = Non-Hispanic White; pos = positive; PRS = polygenic risk score;  
<sup>a</sup>Analysis restricted to n=680 of total n=717 NHW and AA participants due to missing PRS values.

<sup>b</sup> At centered Age = -1.89699

<sup>c</sup> In centered years

**Supplementary Table 2. Clinical characteristics of progressors (CDR >0) vs non-progressors (CDR = 0) in participants with longitudinal biomarkers**

|                                                                         | Biomarker Negative Non-Progressors |                           | Biomarker Negative Progressors |                           | p-value <sup>a</sup> | Biomarker Positive Non-Progressors |                           | Biomarker Positive Progressors |                           | p-value <sup>a</sup> |
|-------------------------------------------------------------------------|------------------------------------|---------------------------|--------------------------------|---------------------------|----------------------|------------------------------------|---------------------------|--------------------------------|---------------------------|----------------------|
|                                                                         | n                                  | Mean (SD) or %            | n                              | Mean (SD) or %            |                      | n                                  | Mean (SD) or %            | n                              | Mean (SD) or %            |                      |
| Age, mean (SD), y                                                       | 272                                | 64.5 (8.6)                | 18                             | 73.9 (9.4)                | <b>&lt;.0001</b>     | 44                                 | 69.8 (6.6)                | 18                             | 72.2 (6.7)                | 0.1888               |
| Male sex, %                                                             | 96                                 | 35.3                      | 8                              | 44.4                      | 0.4354               | 21                                 | 47.7                      | 7                              | 38.9                      | 0.5287               |
| APOE ε4 carriers, %                                                     | 70                                 | 25.7                      | 5                              | 27.8                      | 0.8493               | 26                                 | 59.1                      | 12                             | 66.7                      | 0.5755               |
| PRS, mean (SD)                                                          | 272                                | -0.00355 (0.00682)        | 18                             | -0.00500 (0.00731)        | 0.3835               | 44                                 | -0.00207 (0.00758)        | 18                             | -0.00221 (0.00802)        | 0.9493               |
| Education, mean (SD), y                                                 | 272                                | 16.1 (2.5)                | 18                             | 15.0 (2.4)                | 0.0731               | 44                                 | 16.2 (2.6)                | 18                             | 15.0 (3.6)                | 0.1368               |
| Interval from baseline assessment to final assessment, mean (SD), y     | 272                                | 7.3 (3.0)<br>{median=7.2} | 18                             | 7.3 (3.2)<br>{median=8.1} | 0.9796               | 44                                 | 6.7 (2.9)<br>{median=6.0} | 18                             | 9.0 (2.8)<br>{median=9.4} | <b>0.0076</b>        |
| Interval from baseline biomarker to final biomarker, mean (SD), y       | 272                                | 7.1 (3.0)<br>{median=7.0} | 18                             | 7.1 (3.3)<br>{median=7.6} | 0.9472               | 44                                 | 6.7 (2.9)<br>{median=5.8} | 18                             | 8.7 (2.8)<br>{median=9.2} | <b>0.0131</b>        |
| No. defined by CSF biomarker, %                                         | 8                                  | 6.6                       | 1                              | 5.6                       | 0.5353               | 0                                  | -                         | 1                              | 5.6                       | -                    |
| Baseline p-tau181/Aβ42, mean (SD)                                       | 8                                  | 0.0108 (0.0029)           | 1                              | 0.0095                    | 0.6823               | 0                                  | -                         | 1                              | 0.0469                    | -                    |
| Final p-tau181/ Aβ42, mean (SD)                                         | 8                                  | 0.0142 (0.0088)           | 1                              | 0.0103                    | 0.6884               | 0                                  | -                         | 1                              | 0.1118                    | -                    |
| No. defined by PET, %                                                   | 264                                | 97.1                      | 17                             | 94.4                      | 0.5353               | 44                                 | 100                       | 17                             | 94.4                      | 0.1141               |
| Baseline PIB SUVR, mean (SD)                                            | 238                                | 1.0254 (0.0956)           | 14                             | 1.0268 (0.0988)           | 0.9584               | 40                                 | 2.1144 (0.5398)           | 17                             | 2.5836 (0.7872)           | <b>0.0118</b>        |
| Final PIB SUVR, mean (SD)                                               | 69                                 | 1.1428 (0.2650)           | 10                             | 1.1559 (0.1783)           | 0.8807               | 11                                 | 2.5670 (0.6051)           | 8                              | 2.9998 (0.3767)           | 0.0930               |
| Baseline AV45 SUVR, mean (SD)                                           | 26                                 | 0.9658 (0.1662)           | 3                              | 0.9417 (0.2684)           | 0.8233               | 4                                  | 2.0505 (0.3053)           | 0                              | -                         | -                    |
| Final AV45 SUVR, mean (SD)                                              | 185                                | 1.0123 (0.2875)           | 5                              | 0.9328 (0.2307)           | 0.5410               | 30                                 | 2.1639 (0.6068)           | 8                              | 2.5570 (0.6295)           | 0.1148               |
| Baseline Centiloid, mean (SD)                                           | 264                                | -2.0829 (5.7076)          | 17                             | -2.8839 (8.1490)          | 0.6949               | 44                                 | 48.9123 (24.0596)         | 17                             | 68.7615 (35.4251)         | <b>0.0448</b>        |
| Final Centiloid, mean (SD)                                              | 253                                | -3.0721 (17.6139)         | 15                             | -0.6147 (12.7160)         | 0.5953               | 41                                 | 68.0816 (35.3633)         | 16                             | 90.9494 (30.3974)         | <b>0.0337</b>        |
| <b>No. converted from biomarker negative to positive, %<sup>b</sup></b> | 27                                 | 9.93%                     | 1                              | 5.56%                     | 0.5419               |                                    |                           |                                |                           |                      |

Data only include the subset of participants with at least one additional biomarker assessment of the same modality used to define original biomarker status

Abbreviations: Aβ = amyloid-beta; AV45 = florbetapir (<sup>18</sup>F-AV-45); CDR = Clinical Dementia Rating; PIB = Pittsburgh compound B; p-tau181 = tau phosphorylated at position 181; PRS = polygenic risk score; SUVR = standardized uptake value ratio;

<sup>a</sup> p-values derived from tests comparing mean or % values between non-progressor and progressor subgroups for biomarker-negative and biomarker-positive participants

<sup>b</sup> The average interval between first and final biomarker assessment for biomarker converters was 8.1 years for non-progressors and 6.5 years for the single progressor

**Supplementary Table 3. Neuropathological diagnoses of progressors (CDR >0) vs non-progressors (CDR = 0) by biomarker status.**

|                                                         | Biomarker-Negative Non-Progressors |                | Biomarker-Negative Progressors |                | Biomarker-Positive Non-Progressors |                | Biomarker-Positive Progressors |                |
|---------------------------------------------------------|------------------------------------|----------------|--------------------------------|----------------|------------------------------------|----------------|--------------------------------|----------------|
|                                                         | <i>n</i>                           | Mean (SD) or % | <i>n</i>                       | Mean (SD) or % | <i>n</i>                           | Mean (SD) or % | <i>n</i>                       | Mean (SD) or % |
| Age, mean (SD), y                                       | 18                                 | 76.8 (7.2)     | 17                             | 81.3 (7.0)     | 7                                  | 74.9 (7.2)     | 15                             | 80.3 (5.2)     |
| Male sex, %                                             | 8                                  | 44.4           | 9                              | 52.9           | 2                                  | 28.6           | 6                              | 40.0           |
| APOE ε4 carriers, %                                     | 3                                  | 16.7           | 1                              | 5.9            | 3                                  | 42.9           | 7                              | 46.7           |
| Interval from baseline biomarker to death, mean (SD), y | 18                                 | 5.7 (3.0)      | 17                             | 7.9 (3.2)      | 7                                  | 5.0 (2.4)      | 15                             | 8.5 (3.0)      |
| Diagnosis, %                                            |                                    |                |                                |                |                                    |                |                                |                |
| Int-High ADNC <sup>a</sup>                              | 0                                  | 0              | 3                              | 17.6           | 5                                  | 71.4           | 15                             | 100            |
| Any Vascular Disease <sup>b</sup>                       | 16                                 | 88.9           | 17                             | 100            | 7                                  | 100            | 14                             | 93.3           |
| Substantial Vascular Disease <sup>c</sup>               | 7                                  | 38.9           | 7                              | 41.2           | 0                                  | 0              | 9                              | 60.0           |
| Cerebral Lewy Body <sup>d</sup>                         | 1                                  | 5.6            | 4                              | 23.5           | 1                                  | 14.3           | 3                              | 20.0           |
| Hippocampal Sclerosis                                   | 0                                  | 6.9            | 3                              | 17.6           | 0                                  | 0              | 0                              | 0              |
| Primary tauopathy <sup>e</sup>                          | 10 <sup>f</sup>                    | 55.6           | 8 <sup>g</sup>                 | 47.1           | 0                                  | 0              | 7 <sup>h</sup>                 | 46.7           |
| FTLD – TDP                                              | 0                                  | 0              | 1                              | 5.9            | 0                                  | 0              | 0                              | 0              |
| Other                                                   | 4 <sup>i</sup>                     | 22.2           | 3 <sup>j</sup>                 | 17.6           | 3 <sup>k</sup>                     | 42.9           | 7 <sup>l</sup>                 | 46.7           |

Abbreviations: ADNC = Alzheimer's disease neuropathological change; ARTAG = aging-related tau astroglialopathy; AGD = argyrophilic grain disease; CTE = chronic traumatic encephalopathy; CBD = corticobasal degeneration; Int-High = Intermediate-to-high; FTDP-17 = frontotemporal dementia and parkinsonism with tau linked to chromosome 17; FTLD = frontotemporal lobar degeneration; GGT = globular glial tauopathy; LATE-NC = limbic-predominant age-associated TDP-43 encephalopathy neuropathologic change; MTL = medial temporal lobe; PART = primary age-related tauopathy; PiD = Pick disease; PSP = progressive supranuclear palsy; TDP = TAR DNA binding protein 43 (TDP-43);

<sup>a</sup>Defined by NIA-Reagan intermediate-to-high likelihood of AD or NIA-AA intermediate-to-high ADNC

<sup>b</sup>Defined by presence of remote infarcts, hemorrhages, microinfarcts, cerebral microbleeds, any arteriolosclerosis, any white matter rarefaction, subcortical arteriolosclerotic leukoencephalopathy, amyloid angiopathy or other pathologic change related to ischemic or vascular disease

<sup>c</sup>Defined by presence of remote micro/macroad infarcts, remote hemorrhages, severe arteriolosclerosis, severe white matter rarefaction, or subcortical, arteriolosclerotic leukoencephalopathy

<sup>d</sup>Defined by presence of Lewy body pathology in limbic or neocortical regions

<sup>e</sup>Defined by presence of tau pathology consistent with PiD, CBD, PSP, FTDP-17, AGD, tangle-dominant disease/PART, other 4R tauopathies (including GGT and MAPT mutation tauopathies) or other 3R+4R tauopathies (including ARTAG, focal tauopathies, MAPT mutation tauopathies or other unclassifiable tauopathies)

<sup>f</sup>Primary tauopathy pathologies: FTDP-17 (n=1), AGD (n=6), tangle-dominant disease/PART (n=5), other 3R+4R tauopathy (n=5)

<sup>g</sup>Primary tauopathy pathologies: AGD (n=5), other 4R tauopathy (n=1), other 3R+4R tauopathy (n=4)

<sup>h</sup>Primary tauopathy pathologies: CBD (n=1), AGD (n=1), other 4R tauopathy (n=2) other 3R+4R tauopathy (n=4)

<sup>i</sup>Other pathologies: TDP-MTL/LATE-NC (n=2), primary neoplasm (n=2), metastatic neoplasm (n=2)

<sup>j</sup>Other pathologies: Prion disease (n=1), hypertrophic olivary degeneration (n=1), metastatic neoplasm (n=1)

<sup>k</sup>Other pathologies: Metabolic storage disease (n=1), demyelinating disease (n=1), heterotopia (n=1)

<sup>l</sup>Other pathologies: TDP-MTL/LATE-NC (n=2), prion disease (n=1), putative amygdala Lewy neurites (n=1), primary neoplasm (n=1), arachnoid cyst of caudate (n=1)
